# Supplementary material for: Human and mouse neutrophils share core transcriptional programs in both homeostatic and inflamed contexts
Source: PubMed Central journal article supplement (PMC10709367; doi:10.1038/s41467-023-43573-9), 2023-12-08
Supplement: 41467_2023_43573_MOESM7_ESM.pdf [file 41467_2023_43573_MOESM7_ESM.pdf]

## Reporting Summary

Nature Portfolio wishes to improve the reproducibility of the work that we publish. This form provides structure for consistency and transparency in reporting. For further information on Nature Portfolio policies, see our [Editorial Policies](#) and the [Editorial Policy Checklist](#).

### Statistics

For all statistical analyses, confirm that the following items are present in the figure legend, table legend, main text, or Methods section.

n/a Confirmed

- The exact sample size ( $n$ ) for each experimental group/condition, given as a discrete number and unit of measurement
- A statement on whether measurements were taken from distinct samples or whether the same sample was measured repeatedly
- The statistical test(s) used AND whether they are one- or two-sided  
*Only common tests should be described solely by name; describe more complex techniques in the Methods section.*
- A description of all covariates tested
- A description of any assumptions or corrections, such as tests of normality and adjustment for multiple comparisons
- A full description of the statistical parameters including central tendency (e.g. means) or other basic estimates (e.g. regression coefficient) AND variation (e.g. standard deviation) or associated estimates of uncertainty (e.g. confidence intervals)
- For null hypothesis testing, the test statistic (e.g.  $F$ ,  $t$ ,  $r$ ) with confidence intervals, effect sizes, degrees of freedom and  $P$  value noted  
*Give  $P$  values as exact values whenever suitable.*
- For Bayesian analysis, information on the choice of priors and Markov chain Monte Carlo settings
- For hierarchical and complex designs, identification of the appropriate level for tests and full reporting of outcomes
- Estimates of effect sizes (e.g. Cohen's  $d$ , Pearson's  $r$ ), indicating how they were calculated

*Our web collection on [statistics for biologists](#) contains articles on many of the points above.*

### Software and code

Policy information about [availability of computer code](#)

Data collection

Publicly available data was retrieved using release 1.5 of the nf-core fetchngs pipeline. scRNAseq data were collected from the Sequence Read Archive (SRA) and European Nucleotide Archive (ENA). ATAC-sequencing data was retrieved from Gene Expression Omnibus. Flow cytometry data was collected as described below.

Data analysis

We provide analysis code for this study on GitHub: [https://github.com/rgb-lab/inflamed\\_neutrophil\\_transcriptome](https://github.com/rgb-lab/inflamed_neutrophil_transcriptome)

Key packages to reproduce our analysis are listed below.

Package name Version DOI or link

scanpy 1.9.2 <https://scanpy.readthedocs.io/en/stable/index.html>

magick 2.7.3 <https://cran.r-project.org/web/packages/magick/index.html>

DESeq2 1.36.0 <https://doi.org/10.1186/s13059-014-0550-8>

ggvenn 0.1.9 <https://cran.r-project.org/web/packages/ggvenn/index.html>

circlize 0.4.15 <https://doi.org/10.1093/bioinformatics/btu393>

ggsci 2.9 <https://cran.r-project.org/web/packages/ggsci/index.html>

RColorBrewer 1.1-3 <https://cran.r-project.org/web/packages/RColorBrewer/index.html>

viridis 0.6.2 <https://cran.r-project.org/web/packages/viridis/index.html>

viridisLite 0.4.0 <https://cran.r-project.org/web/packages/viridisLite/index.html>

MASS 7.3-57 <https://cran.r-project.org/web/packages/MASS/index.html>

rstatix 0.7.0 <https://cran.r-project.org/web/packages/rstatix/index.html>

ggbreak 0.0.9 <https://cran.r-project.org/web/packages/ggbreak/index.html>

reshape2 1.1.4 <https://cran.r-project.org/web/packages/reshape2/index.html>

kSamples 1.2-9 <https://cran.r-project.org/web/packages/kSamples/index.html>  
 SuppDists 1.1-9.7 <https://cran.r-project.org/web/packages/SuppDists/index.html>  
 gridExtra 2.3 <https://cran.r-project.org/web/packages/gridExtra/index.html>  
 ggtrastr 1.0.1 <https://cran.r-project.org/web/packages/ggtrastr/index.html>  
 ggtext 0.1.1 <https://cran.r-project.org/web/packages/ggtext/index.html>  
 EnhancedVolcano 1.14.0 <https://doi.org/doi:10.18129/B9.bioc.EnhancedVolcano>  
 ComplexHeatmap 2.12.0 <https://doi.org/10.1093/bioinformatics/btw313>  
 ggrepel 0.9.1 <https://cran.r-project.org/web/packages/ggrepel/index.html>  
 ggpubr 0.4.0 <https://cran.r-project.org/web/packages/ggpubr/index.html>  
 edgeR 3.38.1 <https://doi.org/10.1093/bioinformatics/btp616>  
<https://doi.org/10.1093/nar/gks042>  
<https://doi.org/10.12688/f1000research.8987.2>  
 limma 3.52.1 <https://doi.org/10.1093/nar/gkv007>  
 SummarizedExperiment 1.26.1 <https://doi.org/doi:10.18129/B9.bioc.SummarizedExperiment>  
 Biobase 2.56.0 <https://doi.org/10.1038/nmeth.3252>  
 GenomicRanges 1.48.0 <https://doi.org/doi:10.18129/B9.bioc.GenomicRanges>  
 GenomelnfoDb 1.32.2 <https://doi.org/doi:10.18129/B9.bioc.GenomelnfoDb>  
 IRanges 2.30.0 <https://doi.org/doi:10.18129/B9.bioc.IRanges>  
 S4Vectors 0.34.0 <https://doi.org/doi:10.18129/B9.bioc.S4Vectors>  
 BiocGenerics 0.42.0 <https://doi.org/doi:10.18129/B9.bioc.BiocGenerics>  
 MatrixGenerics 1.8.0 <https://doi.org/doi:10.18129/B9.bioc.MatrixGenerics>  
 matrixStats 0.62.0 <https://cran.r-project.org/web/packages/matrixStats/index.html>  
 biomaRt 2.52.0 <https://doi.org/doi:10.18129/B9.bioc.biomaRt>  
 BiocManager 1.30.18 <https://doi.org/10.1038/nmeth.3252>  
 zeallot 0.1.0 <https://cran.r-project.org/web/packages/zeallot/index.html>  
 magrittr 2.0.3 <https://cran.r-project.org/web/packages/magrittr/index.html>  
 forcats 0.5.1 <https://cran.r-project.org/web/packages/forcats/index.html>  
 stringr 1.4.0 <https://cran.r-project.org/web/packages/stringr/index.html>  
 dplyr 1.0.9 <https://cran.r-project.org/web/packages/dplyr/index.html>  
 purrr 0.3.4 <https://cran.r-project.org/web/packages/purrr/index.html>  
 readr 2.1.2 <https://cran.r-project.org/web/packages/readr/index.html>  
 tidyr 1.2.0 <https://cran.r-project.org/web/packages/tidyr/index.html>  
 tibble 3.1.7 <https://cran.r-project.org/web/packages/tibble/index.html>  
 ggplot2 3.3.6 <https://cran.r-project.org/web/packages/ggplot2/index.html>  
 tidyverse 1.3.1 <https://doi.org/10.21105/joss.01686>  
 org.Hs.eg.db 3.15.0 <https://doi.org/doi:10.18129/B9.bioc.org.Hs.eg.db>  
 TxDb.Hsapiens.UCSC.hg38.knownGene 3.15.0 <https://doi.org/doi:10.18129/B9.bioc.TxDb.Hsapiens.UCSC.hg38.knownGene>  
 GenomicFeatures 1.48.3 <https://doi.org/10.1371/journal.pcbi.1003118>  
 AnnotationDbi 1.58.0 <https://doi.org/doi:10.18129/B9.bioc.AnnotationDbi>  
 goseq 1.48.0 <https://doi.org/10.1186/gb-2010-11-2-r14>  
 geneLenDataBase 1.32.0 <https://doi.org/doi:10.18129/B9.bioc.geneLenDataBase>  
 BiasedUrn 1.07 <https://cran.r-project.org/web/packages/BiasedUrn/index.html>  
 vsn 3.64.0  
 survcomp 1.46.0 <https://doi.org/10.1093/bioinformatics/btr511>  
 prodlim 2019.11.13 <https://cran.r-project.org/web/packages/prodlim/index.html>  
 Matrix 1.4-1 <https://cran.r-project.org/web/packages/Matrix/index.html>  
 qvalue 2.15.0 <https://doi.org/10.1073/pnas.1530509100>  
 apeglm 1.18.0 <https://doi.org/doi:10.18129/B9.bioc.apeglm>  
 qusage 2.30.0 <https://doi.org/doi:10.18129/B9.bioc.qusage>  
 fgsea 1.22.0 <https://doi.org/10.1101/060012>  
 msgidbr 7.5.1 <https://doi.org/10.1016%2Fj.cels.2015.12.004>  
 sva 3.44.0 <https://doi.org/doi:10.18129/B9.bioc.sva>  
 BiocParallel 1.30.2 <https://doi.org/doi:10.18129/B9.bioc.BiocParallel>  
 genefilter 1.78.0 <https://doi.org/doi:10.18129/B9.bioc.genefilter>  
 mgcv 1.8-40 <https://cran.r-project.org/web/packages/mgcv/index.html>  
 nlme 3.1-157 <https://cran.r-project.org/web/packages/nlme/index.html>  
 GEOquery 2.64.2 <https://doi.org/10.1093/bioinformatics/btm254>  
 rhdf5 2.40.0 <https://doi.org/doi:10.18129/B9.bioc.rhdf5>  
 jsonlite 1.8.0 <https://cran.r-project.org/web/packages/jsonlite/index.html>  
 httr 1.4.3 <https://cran.r-project.org/web/packages/httr/index.html>  
 readxl 1.4.0 <https://cran.r-project.org/web/packages/readxl/index.html>  
 gridtext 0.1.4 <https://cran.r-project.org/web/packages/gridtext/index.html>  
 writexl 1.4.0 <https://cran.r-project.org/web/packages/writexl/index.html>  
 cowplot 1.1.1 <https://cran.r-project.org/web/packages/cowplot/index.html>  
 HOMER 4.11 <https://doi.org/10.1016/j.molcel.2010.05.004>  
 marge 0.0.4.9999 <https://robertamezquita.github.io/marge/articles/marge-workflow.html#>  
 RVAideMemoire 0.9-81-2 <https://cran.r-project.org/web/packages/RVAideMemoire/index.html>

For manuscripts utilizing custom algorithms or software that are central to the research but not yet described in published literature, software must be made available to editors and reviewers. We strongly encourage code deposition in a community repository (e.g. GitHub). See the Nature Portfolio [guidelines for submitting code & software](#) for further information.

## Data

Policy information about [availability of data](#)

All manuscripts must include a [data availability statement](#). This statement should provide the following information, where applicable:

- Accession codes, unique identifiers, or web links for publicly available datasets
- A description of any restrictions on data availability
- For clinical datasets or third party data, please ensure that the statement adheres to our [policy](#)

All sequencing data was used from publicly available platforms (Gene Expression Omnibus and European Nucleotide Archive), and all accession numbers are listed in Supplementary Data 2. Flow cytometry data have been deposited at flowrepository.org under the accession FR-FCM-Z6U3 and FR-FCM-Z6U4. Source data are provided with this paper.

## Human research participants

Policy information about [studies involving human research participants and Sex and Gender in Research](#).

### Reporting on sex and gender

We collected samples from people of different sexes and genders. Sex- and gender-based analyses were not conducted as this was beyond the scope of the experiments in this particular study given the signal that we validated.

### Population characteristics

Healthy volunteers participating in this study were 20–28 years old. Additional characteristics were not collected as this analysis was beyond the scope of the study given the biological signal that we validated in that section of the paper.

### Recruitment

We recruited adult individuals without apparent current infection and without immunosuppressive medication. Individuals were selected randomly from a pool of co-workers. Potential biases include the confined age-range that could potentially limit the portability of the results to the biology of older individuals. Blood draws were restricted to the time window 8–10 AM to limit circadian variability.

### Ethics oversight

IRB-approval Heidelberg-S-272/2021 obtained from the ethics committee of the University of Heidelberg, Heidelberg, Germany

Note that full information on the approval of the study protocol must also be provided in the manuscript.

## Field-specific reporting

Please select the one below that is the best fit for your research. If you are not sure, read the appropriate sections before making your selection.

- Life sciences     Behavioural & social sciences     Ecological, evolutionary & environmental sciences

For a reference copy of the document with all sections, see [nature.com/documents/nr-reporting-summary-flat.pdf](https://www.nature.com/documents/nr-reporting-summary-flat.pdf)

## Life sciences study design

All studies must disclose on these points even when the disclosure is negative.

### Sample size

For the meta-analysis, the datasets of interest were identified through a literature search on PubMed and the NCBI Gene Expression Omnibus. The number of included samples was limited by public availability of suitable RNA-sequencing samples. For our confirmatory experiments, appropriate statistics including mean-size comparisons for our readouts of interests guided our sample size selection.

### Data exclusions

6 RNA-Seq samples identified in our literature search were removed due to QC concerns. No flow cytometry samples were excluded from this study. We performed strict quality control in flow cytometry as stated in the gating strategy.

### Replication

Flow cytometry was performed on samples collected from 14 human participants and 27 mice across individual experiments, defined as biological replicates. Experiments for Figures 6 and 7 were replicated in three independent experiments. All attempts at replication were successful. We used statistics including mean comparison were appropriate.

### Randomization

All samples were cultured in the 3 conditions of interest, hence no randomization was applicable.

### Blinding

For our flow cytometry experiments, statistical tests and comparisons were decided before data collection, no blinding was performed. In this study, homogenous groups were analyzed without group-comparisons that would require blinding. Downstream analysis after cell gating was performed using publicly available software with standard settings, which provides an unbiased approach towards the analysis and does not require blinding.

# Reporting for specific materials, systems and methods

We require information from authors about some types of materials, experimental systems and methods used in many studies. Here, indicate whether each material, system or method listed is relevant to your study. If you are not sure if a list item applies to your research, read the appropriate section before selecting a response.

## Materials & experimental systems

| n/a                                 | Involvement                         | Material/System               |
|-------------------------------------|-------------------------------------|-------------------------------|
| <input type="checkbox"/>            | <input checked="" type="checkbox"/> | Antibodies                    |
| <input checked="" type="checkbox"/> | <input type="checkbox"/>            | Eukaryotic cell lines         |
| <input checked="" type="checkbox"/> | <input type="checkbox"/>            | Palaeontology and archaeology |
| <input type="checkbox"/>            | <input checked="" type="checkbox"/> | Animals and other organisms   |
| <input checked="" type="checkbox"/> | <input type="checkbox"/>            | Clinical data                 |
| <input checked="" type="checkbox"/> | <input type="checkbox"/>            | Dual use research of concern  |

## Methods

| n/a                                 | Involvement                         | Method                 |
|-------------------------------------|-------------------------------------|------------------------|
| <input checked="" type="checkbox"/> | <input type="checkbox"/>            | ChIP-seq               |
| <input type="checkbox"/>            | <input checked="" type="checkbox"/> | Flow cytometry         |
| <input checked="" type="checkbox"/> | <input type="checkbox"/>            | MRI-based neuroimaging |

## Antibodies

### Antibodies used

Human flow cytometry panel:  
 LIVE/DEAD Pacific Orange N/A BioLegend 423103 1:300  
 LIVE/DEAD BUV496 N/A BioLegend 423107 1:300  
 DAPI BUV496 N/A Sigma-Aldrich D9542 1:1000  
 CD15 APC-Cy7 W6D3 BioLegend 323047 1:100  
 CD69 BV421 FN50 BioLegend 310929 1:50  
 CD40 Alexa Fluor 700 5C3 BioLegend 334327 1:50  
 CD14 PE-Cy7 M5E2 BD Biosciences 557742 1:100  
 IL4R PE G077F6 BioLegend 355003 1:100  
 PD-L1 APC 29E2A3 BioLegend 329708 1:20  
 CD101 APC BB27 BioLegend 331007 1:100  
 CXCR4 BV421 12G5 BioLegend 306517 1:100  
 CD62L BV605 DREG-56 BioLegend 304833 1:100

Mouse flow cytometry panel:  
 Marker Channel Clone Vendor Catalog# dilution  
 LIVE/DEAD Pacific Orange N/A BioLegend 423103 1:300  
 LIVE/DEAD BUV496 N/A BioLegend 423107 1:300  
 DAPI BUV496 N/A Sigma-Aldrich D9542 1:1000  
 Ly6G APC-Cy7 1A8 BioLegend 127623 1:100  
 CD69 BV421 H1.2F3 BioLegend 104527 1:100  
 CD40 PE-Cy5 3/23 BioLegend 124617 1:100  
 CD14 PE-Cy7 Sa14-2 BioLegend 123315 1:100  
 IL4R PE I015F8 BioLegend 144803 1:100  
 PD-L1 APC 10F.9G2 BioLegend 124311 1:100  
 CD101 APC Moushi101 ThermoFisher Scientific 17-1011-82 1:100  
 CXCR4 BV421 L276F12 BioLegend 146511 1:100  
 CD62L BV605 MEL-14 BioLegend 104437 1:100

### Validation

Antibodies only included established, well validated clones and were validated by the manufacturer (details on the product page for each antibody, see catalog numbers above). No additional antibody validation was performed.

BioLegend obtained antibodies: Manufacturer's quality control includes specificity testing of 1-3 target cell types with either single- or multi-color analysis (including positive and negative cell types) with the evaluation of brightness for negative and positive cell populations in comparison to reference lots. Each product is validated by QC testing with a series of dilutions.

BD Biosciences obtained antibody: BD Biosciences established reference standards for all antibodies and when new lots are produced, they are compared to this reference (gold standard). The new lots must match the performance with regards to the quality control (QC) specifications that were set for that given antibody (clone and format). They do not release our QC specifications. (personal correspondence)

All specified antibodies were verified to show reactivity towards their respective antigen in human or mouse. For anti-human CXCR4 (BioLegend 306517) and anti-human CD40 (BioLegend 334327), species reactivity of Cynomolgus and Rhesus were verified. All specified antibodies were validated for surface staining in flow cytometry applications as used in this study.

## Animals and other research organisms

Policy information about [studies involving animals](#); [ARRIVE guidelines](#) recommended for reporting animal research, and [Sex and Gender in Research](#)

|                         |                                                                                                                                                                                              |
|-------------------------|----------------------------------------------------------------------------------------------------------------------------------------------------------------------------------------------|
| Laboratory animals      | Mus musculus, C57BL/6J, 8-12 weeks                                                                                                                                                           |
| Wild animals            | No wild animals were used in this study                                                                                                                                                      |
| Reporting on sex        | Both female and male mice were used. Sex-based analyses were not conducted as this was beyond the scope of the experiments in this particular study given the signal that we validated.      |
| Field-collected samples | No field collected samples were used in this study.                                                                                                                                          |
| Ethics oversight        | Approval of the Animal Care Facility Heidelberg and the Animal Welfare Officers (approval #T66/21) at the Interfaculty Biomedical Research Facility (IBF), University of Heidelberg, Germany |

Note that full information on the approval of the study protocol must also be provided in the manuscript.

## Flow Cytometry

### Plots

Confirm that:

- The axis labels state the marker and fluorochrome used (e.g. CD4-FITC).
- The axis scales are clearly visible. Include numbers along axes only for bottom left plot of group (a 'group' is an analysis of identical markers).
- All plots are contour plots with outliers or pseudocolor plots.
- A numerical value for number of cells or percentage (with statistics) is provided.

### Methodology

Sample preparation

Human: Peripheral blood of healthy donors was collected (IRB-approval: Heidelberg-S-272/2021). Neutrophils were isolated using density gradient centrifugation with Polymorphprep, 30 ml whole blood was layered onto 20 ml Polymorphprep and centrifuged at 535 g for 35 minutes. The PBMC-containing layer was discarded by suction and neutrophils were recovered and subjected to hypotonic lysis using 0.2% NaCl. The cells were subsequently washed with cell culture medium (RPIM-1640 + 10% FBS + 1% GlutaMAX) and seeded at 5 million cells per 6 wells in a total volume of 5 ml at a humidified atmosphere at 37° C with 5% CO<sub>2</sub>. The cells were cultured over 48h either in the absence of cytokines (vehicle control), with GM-CSF + IFN-gamma or GM-CSF + LPS. GM-CSF was used at a final concentration of 100 U/ml, IFN-gamma at 10 ng/ml and LPS at 100 ng/ml. After 48h, 1 million cells were collected and stained using the Zombie Yellow Fixable Viability Kit for live/dead discrimination, followed by an antibody panel in 50µL of FACS buffer (2% FBS, 5mM EDTA and 0.1% sodium azide in PBS for 25 minutes.

Mouse: Male and female C57BL/6J mice were sacrificed by cervical dislocation and bone marrow was extracted by flushing with RPMI. Neutrophils were enriched by density centrifugation using Histopaque 1077 and Histopaque 1119. Cells were recovered from the interphase of both Histopaque layers and centrifuged. Cells were washed with RPMI containing 10% FBS and 1% Glutamax and seeded at 10<sup>6</sup> cells/ml in 48 well plates in a total volume of 500 µl. Murine GM-CSF, murine IFN-γ and LPS were added to the medium for 24 hours and 48 hours in combination as indicated in the respective figures. Cells cultured in the absence of cytokines were used as controls. After the indicated times, cells were collected and stained with the antibody panel in 50 µl of FACS buffer containing 2% FBS, 5 mM EDTA and 0.1% sodium azide.

To assess neutrophils from different organs, mice were sacrificed by cardiac puncture under generalized anesthesia. Subsequently, the femora and tibiae were flushed with PBS to obtain bone marrow. Any remaining fat was removed from spleens and splenic tissue was mechanically disintegrated using the back of a syringe. Cells were pelleted at 400 g and erythrocytes were lysed using ACK Lysing Buffer for 5 minutes at 4°C. Cells were seeded at 10<sup>6</sup> cells/ml in 48 well plates in a total volume of 500 µl. Cytokines were added as described above for a total of 8 hours.

|                           |                                                                                                                                                                                            |
|---------------------------|--------------------------------------------------------------------------------------------------------------------------------------------------------------------------------------------|
| Instrument                | Flow cytometry was performed on an BD LSRII flow cytometer.                                                                                                                                |
| Software                  | Flow cytometry files were analyzed using BD FACSDiva version 8.0.1 and FlowJo version 10.8.0.                                                                                              |
| Cell population abundance | The population of interest (CD15-APC-Cy7 positive in human or Ly6G-APC-Cy7 in mice) exceeded fraction of 75% living cells in our analyses as defined in the gating strategy.               |
| Gating strategy           | Cells were gated for singlets in FSC-A/FSC-H, for PMN's by FSC-A/SSC-A, living cells by Zombie Yellow/ZombieUV/DAPI, and neutrophils by CD15-APC-Cy7 in human and by Ly6G-APC-Cy7 in mice. |

- Tick this box to confirm that a figure exemplifying the gating strategy is provided in the Supplementary Information.
